# Supplementary material for: Utilizing mapping targets of sequences underrepresented in the reference assembly to reduce false positive alignments
Source: PubMed Central journal article supplement — Nucleic Acids Res. 2015 Jul 10;43(20):e133. doi: 10.1093/nar/gkv671 (PMC4787761; doi:10.1093/nar/gkv671), 2015-07-10
Supplement: supp_gkv671_nar-03216-met-k-2014-File006.pdf [file supp_gkv671_nar-03216-met-k-2014-File006.pdf]

**Supplemental Table 1:** Further classification based on sequence similarity to previously characterized reference databases for satellite repeats: alpha, beta, gamma, HSat 1-6, and subtelomeric repeats.

|                                                      | Total Reads | GRCh37/hg19 Mapping Targets |                                                        |           |              | GRCh38/hg38 Mapping Targets |                                                        |           |              |
|------------------------------------------------------|-------------|-----------------------------|--------------------------------------------------------|-----------|--------------|-----------------------------|--------------------------------------------------------|-----------|--------------|
|                                                      |             | Align to hg19               | Filtered Reads based on Parology to Reference Assembly | Remaining | Est Genome % | Align to hg38               | Filtered Reads based on Parology to Reference Assembly | Remaining | Est Genome % |
| <b>Alpha Satellite (ALR,ALR1,ALR2,ALRa,b)</b>        | 826394      | 172295                      | 9486                                                   | 816908    | 2.58248125   | 172301                      | 64305                                                  | 762089    | 2.58248125   |
| <b>HSAT II, III (GGAAT)</b>                          | 456231      | 391016                      | 52968                                                  | 403263    | 1.425721875  | 391033                      | 66231                                                  | 390000    | 1.425721875  |
| <b>HSAT I (HSATI,SAR)</b>                            | 39270       | 35790                       | 130                                                    | 39140     | 0.12271875   | 35827                       | 378                                                    | 38892     | 0.12271875   |
| <b>Gamma Satellite (GSAT, GSATII, GSATX)</b>         | 42311       | 833                         | 187                                                    | 42124     | 0.132221875  | 836                         | 258                                                    | 42053     | 0.132221875  |
| <b>Beta Satellite (BSR,BSRa,BSRb,BSRd,BSRf,LSAU)</b> | 6858        | 6791                        | 1414                                                   | 5444      | 0.02143125   | 6818                        | 1873                                                   | 4985      | 0.02143125   |
| <b>rDNA</b>                                          | 214862      | 210941                      | 105855                                                 | 109007    | 0.67144375   | 211288                      | 141555                                                 | 73307     | 0.67144375   |
| <b>HSAT IV</b>                                       | 8           | 7                           | 5                                                      | 3         | 0.000025     | 7                           | 5                                                      | 3         | 0.000025     |
| <b>ACRO1</b>                                         | 3538        | 3519                        | 171                                                    | 3367      | 0.01105625   | 3519                        | 1765                                                   | 1773      | 0.01105625   |
| <b>CER</b>                                           | 2596        | 2588                        | 977                                                    | 1619      | 0.0081125    | 2588                        | 1586                                                   | 1010      | 0.0081125    |
| <b>D20S16</b>                                        | 102         | 100                         | 44                                                     | 58        | 0.00031875   | 100                         | 46                                                     | 56        | 0.00031875   |
| <b>MSR1</b>                                          | 51          | 50                          | 29                                                     | 22        | 0.000159375  | 50                          | 30                                                     | 21        | 0.000159375  |
| <b>REP522</b>                                        | 442         | 439                         | 250                                                    | 192       | 0.00138125   | 439                         | 295                                                    | 147       | 0.00138125   |
| <b>SATR1,2</b>                                       | 873         | 868                         | 587                                                    | 286       | 0.002728125  | 868                         | 628                                                    | 245       | 0.002728125  |
| <b>SN5</b>                                           | 131         | 131                         | 83                                                     | 48        | 0.000409375  | 131                         | 84                                                     | 47        | 0.000409375  |
| <b>TAR1</b>                                          | 296         | 293                         | 143                                                    | 153       | 0.000925     | 293                         | 187                                                    | 109       | 0.000925     |
