# Supplementary material for: Utilizing mapping targets of sequences underrepresented in the reference assembly to reduce false positive alignments
Source: PubMed Central journal article supplement — Nucleic Acids Res. 2015 Jul 10;43(20):e133. doi: 10.1093/nar/gkv671 (PMC4787761; doi:10.1093/nar/gkv671), 2015-07-10
Supplement: supp_gkv671_nar-03216-met-k-2014-File007.pdf [file supp_gkv671_nar-03216-met-k-2014-File007.pdf]

**Supplemental Table 2:** Description of the short-read experimental datasets used in this study*ENCODE DATASETS*

| <b>Experiment (Assay) type</b>                   | <b>Sequencing Provider</b>    | <b>Cell Line</b> | <b>Link to fasta files</b>                                                                                                                                                              | <b>File Name</b>                                    |
|--------------------------------------------------|-------------------------------|------------------|-----------------------------------------------------------------------------------------------------------------------------------------------------------------------------------------|-----------------------------------------------------|
| CTCF                                             | Broad Institute               | GM12878          | <a href="http://hgdownload.cse.ucsc.edu/goldenpath/hg19/encodeDCC/wgEncodeBroadHistone/">http://hgdownload.cse.ucsc.edu/goldenpath/hg19/encodeDCC/wgEncodeBroadHistone/</a>             | wgEncodeBroadHistoneGm12878CtcfStdRawDataRep1       |
| H3K4me3                                          | Broad Institute               | GM12878          | <a href="http://hgdownload.cse.ucsc.edu/goldenpath/hg19/encodeDCC/wgEncodeBroadHistone/">http://hgdownload.cse.ucsc.edu/goldenpath/hg19/encodeDCC/wgEncodeBroadHistone/</a>             | wgEncodeBroadHistoneGm12878H3k04me3StdRawDataRep2V2 |
| H3K27me3                                         | Broad Institute               | GM12878          | <a href="http://hgdownload.cse.ucsc.edu/goldenpath/hg19/encodeDCC/wgEncodeBroadHistone/">http://hgdownload.cse.ucsc.edu/goldenpath/hg19/encodeDCC/wgEncodeBroadHistone/</a>             | wgEncodeBroadHistoneGm12878H3k27me3StdRawDataRep1   |
| H3K9me3                                          | Broad Institute               | GM12878          | <a href="http://hgdownload.cse.ucsc.edu/goldenpath/hg19/encodeDCC/wgEncodeBroadHistone/">http://hgdownload.cse.ucsc.edu/goldenpath/hg19/encodeDCC/wgEncodeBroadHistone/</a>             | wgEncodeBroadHistoneGm12878H3k9me3StdRawDataRep1    |
| Long RNA Seq                                     | Cold Spring Harbor Laboratory | GM12878          | <a href="http://hgdownload.cse.ucsc.edu/goldenpath/hg19/encodeDCC/wgEncodeCshLongRnaSeq/">http://hgdownload.cse.ucsc.edu/goldenpath/hg19/encodeDCC/wgEncodeCshLongRnaSeq/</a>           | wgEncodeCshLongRnaSeqGm12878CellPapFastqRd1Rep1     |
| Methyl Seq                                       | Haib                          | GM12878          | <a href="http://hgdownload-test.cse.ucsc.edu/goldenPath/hg19/encodeDCC/wgEncodeHaibMethylSeq/">http://hgdownload-test.cse.ucsc.edu/goldenPath/hg19/encodeDCC/wgEncodeHaibMethylSeq/</a> | wgEncodeHaibMethylSeqGm12878HpaRawDataRep1          |
| GABP                                             | Haib                          | GM12878          | <a href="http://hgdownload-test.cse.ucsc.edu/goldenPath/hg19/encodeDCC/wgEncodeHaibMethylSeq/">http://hgdownload-test.cse.ucsc.edu/goldenPath/hg19/encodeDCC/wgEncodeHaibMethylSeq/</a> | wgEncodeHaibTfbsGm12878GbpPcr2xRawDataRep2          |
| DNase-seq                                        | University of Washington      | GM12878          | <a href="http://hgdownload.cse.ucsc.edu/goldenpath/hg19/encodeDCC/wgEncodeUwDnase/">http://hgdownload.cse.ucsc.edu/goldenpath/hg19/encodeDCC/wgEncodeUwDnase/</a>                       | wgEncodeUwDnaseGm12878RawDataRep1                   |
| <i>ADDITIONAL GENOMIC DATASETS USED IN STUDY</i> |                               |                  |                                                                                                                                                                                         |                                                     |
| <b>Experiment (Assay) type</b>                   | <b>Sequencing Provider</b>    | <b>Cell Line</b> | <b>Link to fasta files</b>                                                                                                                                                              | <b>File Name</b>                                    |
| HuRef Genomic                                    | Duke University               | HuRef            | <a href="http://hgwdev.soe.ucsc.edu/~kehayden/NAR_methods/">http://hgwdev.soe.ucsc.edu/~kehayden/NAR_methods/</a>                                                                       | HUREF-Genomic                                       |
| Yoruba Genomic                                   | Duke University               | GM129239         | <a href="http://hgwdev.soe.ucsc.edu/~kehayden/NAR_methods/">http://hgwdev.soe.ucsc.edu/~kehayden/NAR_methods/</a>                                                                       | GM129239-Genomic                                    |
